# Supplementary material for: Regulation of NDR1 activity by PLK1 ensures proper spindle orientation in mitosis
Source: PubMed Central journal article supplement (PMC4460818; doi:10.1038/srep10449), 2015-06-09
Supplement: srep10449-s1.pdf [file srep10449-s1.pdf]

## **Supplementary Information**

**Regulation of NDR1 activity by PLK1 ensures proper spindle orientation in mitosis**

Maomao Yan, Lingluo Chu, Bo Qin, Zhikai Wang, Xing Liu, Changjiang Jin, Guanglan Zhang, Marta Gomez, Alexander Hergovich, Zhengjun Chen, Ping He, Xinjiao Gao, Xuebiao Yao

# Supplementary Figure S1

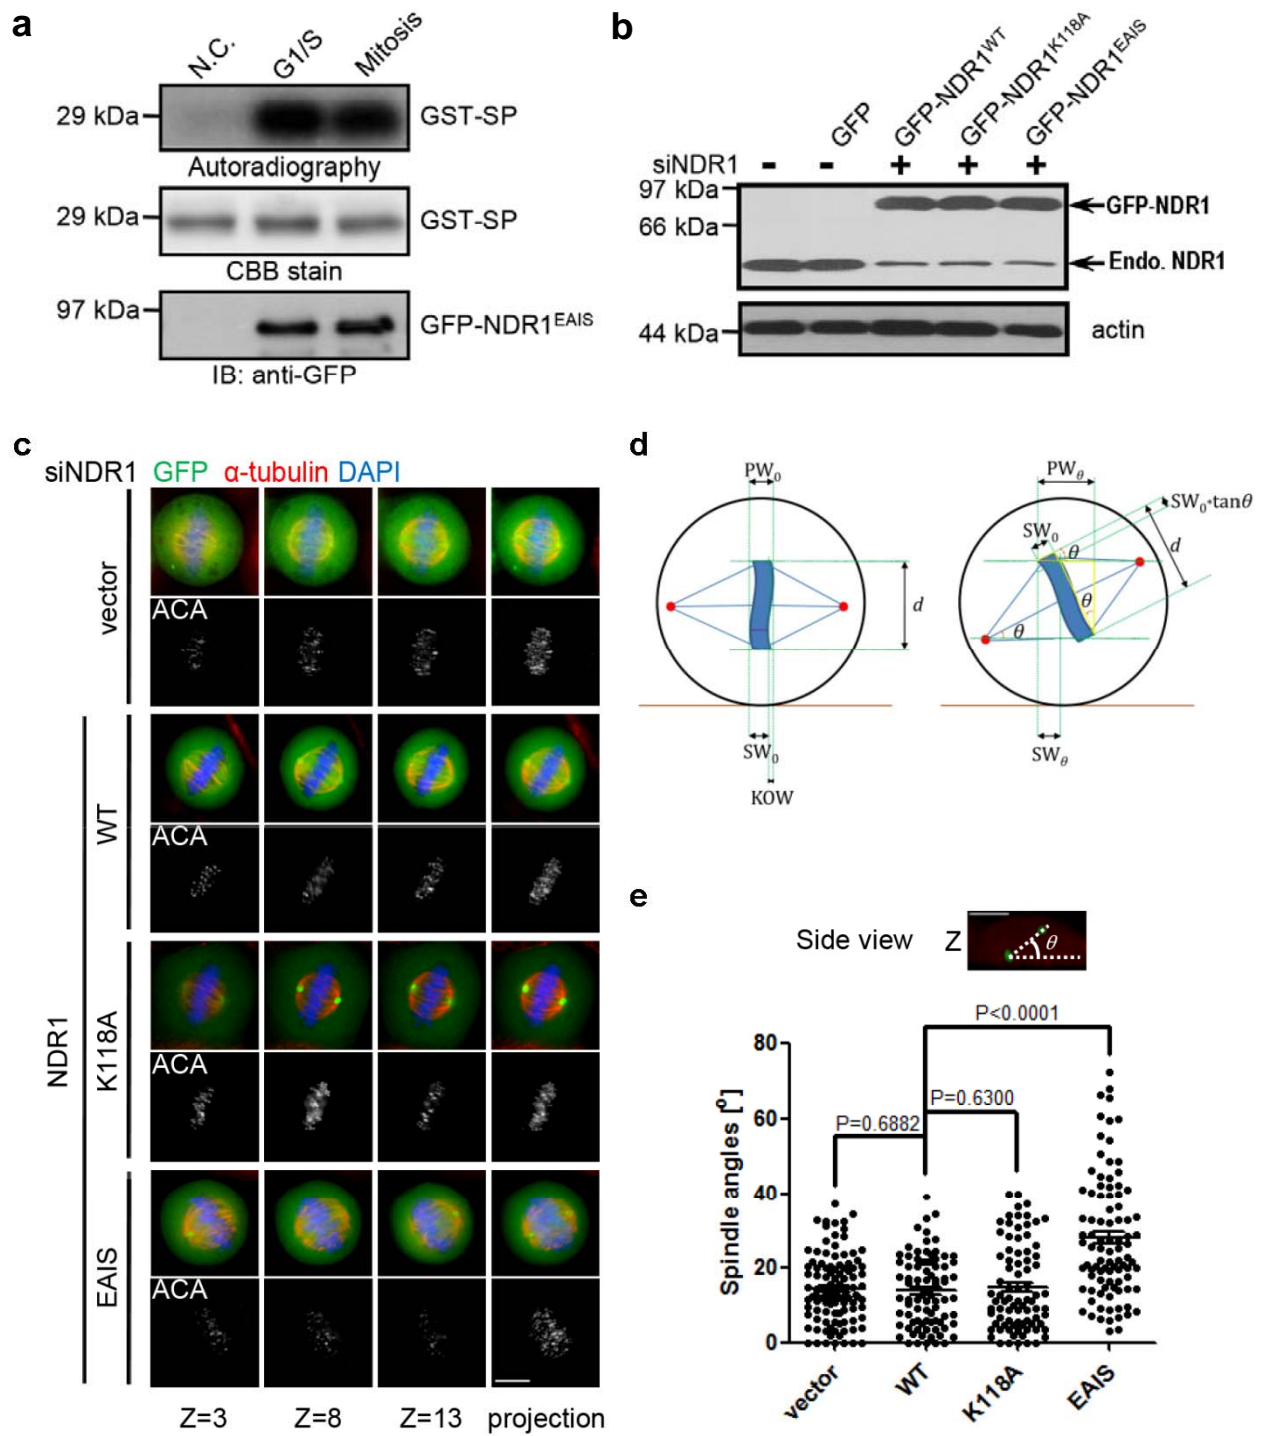

# Supplemental Figure S2

## Prediction of kinase-specific phosphorylation sites on NDR1

| Predicted Sites |          |      |                |                 |       |        |
|-----------------|----------|------|----------------|-----------------|-------|--------|
| ID              | Position | Code | Kinase         | Peptide         | Score | Cutoff |
| gi 56749457 ... | 7        | T    | Other/PLK/P... | *MAMTGSTPCSSMSN | 1.596 | 1.298  |
| gi 56749457 ... | 183      | T    | Other/PLK/P... | TLLMKKDTLTEEETQ | 1.404 | 1.298  |
| gi 56749457 ... | 407      | T    | Other/PLK/P... | EIKSIDDTSNFDEFP | 1.532 | 1.298  |

### Enter sequence(s) in FASTA format

```
>gi|56749457|sp|Q15208.1|STK38_HUMAN RecName: Full=Serine/threonine-protein kinase 38; AltName: Full=NDR1 protein kinase; AltName: Full=Nuclear Dbf2-related kinase 1
MAMTGSTPCSSMSNHTKERVTMTKVLTLENFYSNLIAQHEEREMRQKKLEKVMEEEGLKDEEKRLRRSAHARKET
EFLRLKRTRLGLEDFESLKVIGRGAFGEVRLVQKKDGHVYAMKILRKADMLEKEQVGHIRAERDILVEADSLWVV
KMFYSFQDKLNLYLIMEFLPGGDMMTLLMKKDTLTEEETQFYAETVLAIDSIHQLGFIHRDIKPDNLLLDKGHVKL
SDFGLCTGLKKAHRTEFYRNLNHSLPSDFTFQNMNSKRKAETWKRNRRLAFSTVGTDPDYIAPEVFMQGTGYNKL
CDWWSLGVIMYEMLIGYPPFCSETPQETYKVMNWKETLTFPPEVPISEKAKDLILRFCEWEHRIGAPGVVEIKS
NSFFEGVDWEHIRERPAAISIEIKSIDDTSNFDEFPESDILKPTVATSNHPETDYKNKDWWFINYTYKRFEGLTARGA
IPSYMKAAK
```

# Supplemental Figure S4

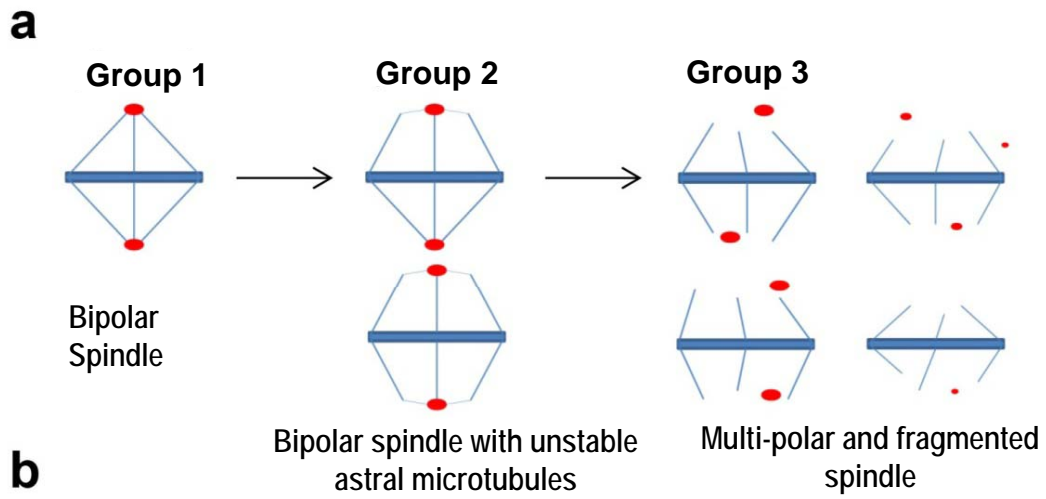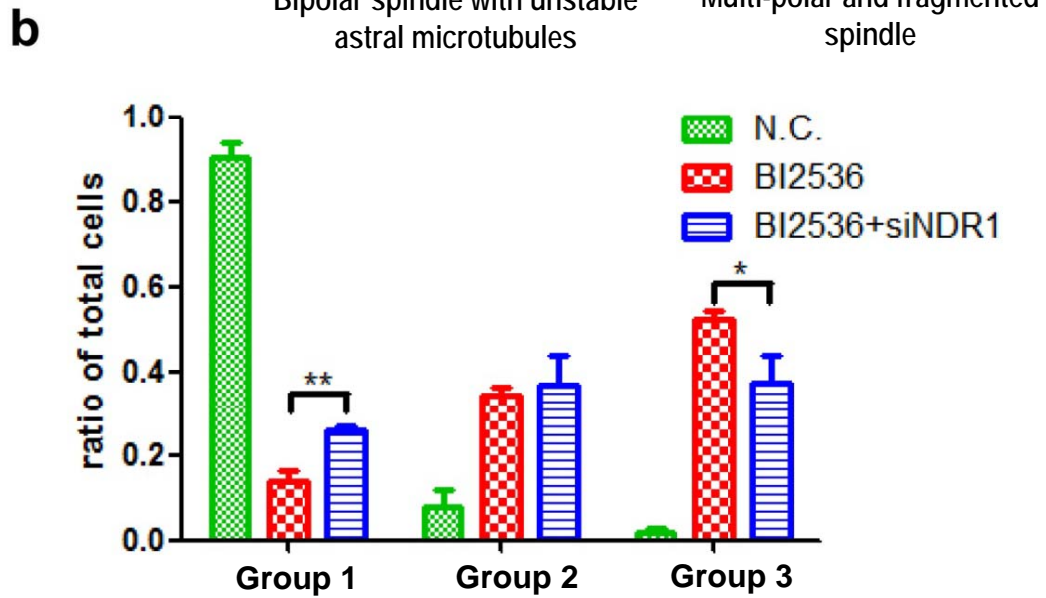

Supplementary Figure S5

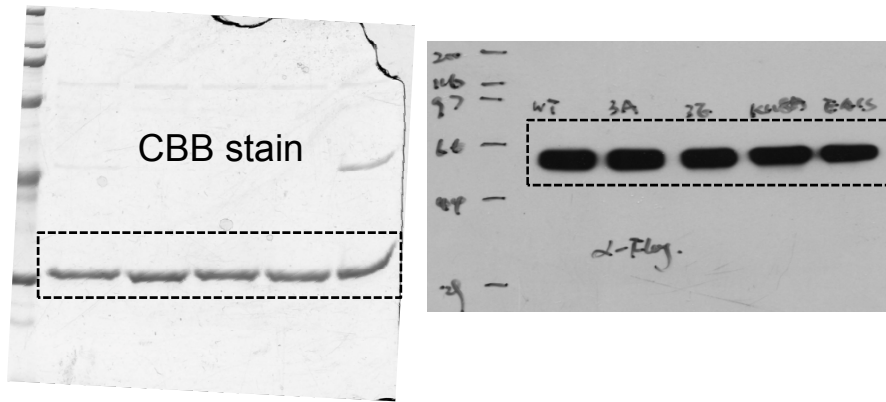

Figure 3b

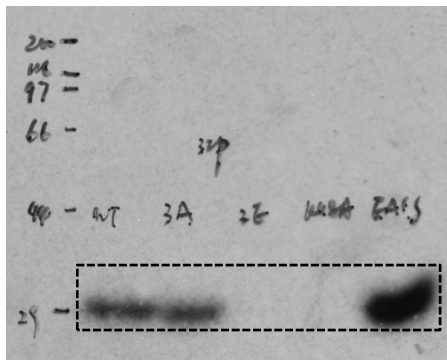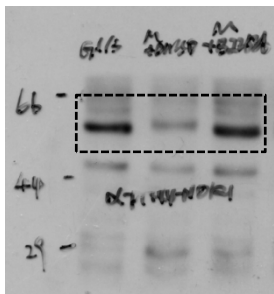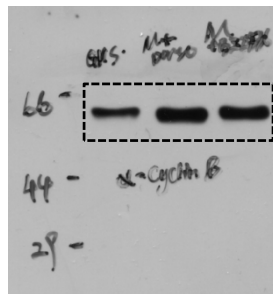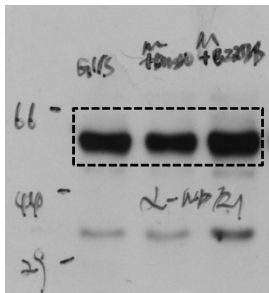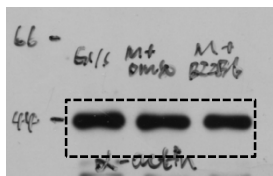

Figure 3e

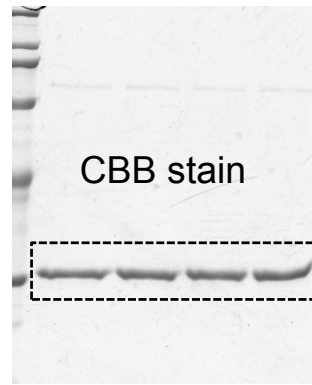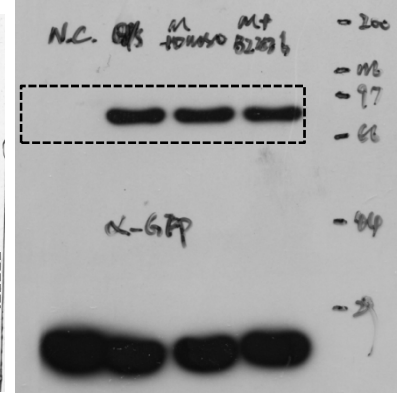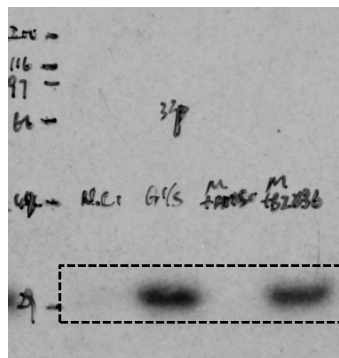

Figure 3f

## Supplementary Figure Legends

### Supplementary Figure S1. Persistent activation of NDR1 leads to aberrant mitotic spindle orientation

**(a)** Characterization of the kinase activity of siRNA-resistant GFP-NDR1<sup>E<sub>AIS</sub></sup>. HeLa cells were transfected with GFP vector or siRNA-resistant GFP-NDR1<sup>E<sub>AIS</sub></sup>, and then GFP-NDR1<sup>E<sub>AIS</sub></sup>-transfected cells were synchronized at interphase (G1/S) or mitosis. GFP-NDR1<sup>E<sub>AIS</sub></sup> purified from these cell lysates was subjected to *in vitro* kinase assay with GST-SP as the substrate, in the presence of [ $\gamma$ -<sup>32</sup>P]-ATP. The activities of GFP-NDR1<sup>E<sub>AIS</sub></sup> were judged and measured by <sup>32</sup>P incorporation into GST-SP from *in vitro* kinase assay. The substrate (GST-SP) and kinase (GFP-NDR1<sup>E<sub>AIS</sub></sup>) inputs were tested by Coomassie Brilliant Blue stain and immunoblot, respectively. Cropped gel for CBB stain and autoradiography, cropped blot from another gel.

**(a)** Characterization of NDR1 siRNA and GFP-tagged NDR1 siRNA-resistant constructs. HeLa cells were transfected with scramble siRNA or scramble siRNA plus GFP or GFP-tagged NDR1 siRNA-resistant constructs, then the whole cell lysates were collected and analyzed by immunoblot with antibodies against NDR1 and actin. Cropped blots from one gel.

**(c)** Chromosome alignment along with NDR1 activity in immunofluorescence analyses. The projection widths (PW) of chromosome alignment in NDR1<sup>E<sub>AIS</sub></sup>-expressing cells were much larger than the single layer widths (SW) of chromosome alignment, while in NDR1<sup>WT</sup> or NDR1<sup>K118A</sup>-expressing cells, the PWs were very close to the SWs. HeLa cells

were co-transfected with NDR1 siRNA plus various siRNA-resistant NDR1 constructs. At 12 hours after transfection, cells were synchronized by 2 mM thymidine for 16 hours, and then released for 10 hours. Before fixation, MG132 was added for 2 hours. Cells were co-stained for microtubules (red), kinetochores (white) and DNA (blue). Images with z-sections (0.4  $\mu\text{m}$  per stack) and z-projection are shown. The scale bar represents 10  $\mu\text{m}$ .

**(d)** Schematic diagram of the longitudinal section of mitotic cells for explanation of **(c)**

Left: When the mitotic spindle axis is parallel to the substratum, the Projection Width (PW) is equal to the addition of the Single layer Width (SW) and the Kinetochores Oscillation Width (KOW). Because the KOW is relatively small compared to SW or PW, the relationships of SW and PW can be expressed as following:  $PW_0 \cong SW_0$ . Right: Because the diameter of chromosome alignment roundel ( $d$ ) is much bigger than the SW, when the mitotic spindle axis is acclivitous, the PW is much bigger than SW, following:

$$PW_{\theta} \cong SW_0 / \cos \theta + (d - SW_0 \times \tan \theta) \times \sin \theta \cong SW_{\theta} + (d - SW_0 \times \tan \theta) \times \sin \theta \quad . \quad \text{The}$$

brown lines represent the substratum, the ring represents the cell cortex, the red dots represent the spindle poles, the blue bands represent the zones of chromosome alignment, the blue lines represent the spindle microtubules,  $d$  represents the diameter of chromosome alignment roundel,  $\theta$  represents the spindle angle relative to the substratum, the yellow triangles are right triangles.

**(e)** The spindle angles of metaphase cells shown in **(c)** were calculated by the formula

described in Figure 1d and shown as scatter plots. The positions of spindle poles were roughly judged by the  $\alpha$ -tubulin stain. Each point represents one metaphase cell. The mean values are also shown. Bar indicate means  $\pm$  SEM from analyses of more than 80 cells from three independent experiments. Each  $p$ -value is calculated using student's  $t$ -test.

**Supplementary Figure S2** Prediction of phosphorylation sites within NDR1 modified by PLK1

Human NDR1 protein sequence in FASTA format was downloaded from UniProtKB and submitted to GPS 2.1 software. The phosphorylated sites on NDR1 were predicted toward PLK1 at the high threshold.

**Supplementary Figure S3** Characterization of His-NDR1 purification and the influence of NDR1 activity on PLK1 activity in mitosis

**(a)** His<sub>6</sub>-tagged NDR1 (WT, K118A or 3E) expressed in Sf9 insect cells was purified by NTA-Ni<sup>2+</sup> agarose beads, after washes, the beads were boiled as “loaded”, then kinases were eluted by imidazole. The final solutions were boiled as “eluted”. All the samples were separated by SDS-PAGE followed by Coomassie Brilliant Blue stain.

**(b)** HeLa cells were transfected with scramble siRNA or NDR1 siRNA plus GFP vector or GFP-tagged NDR1 siRNA-resistant constructs. And then cells were synchronized at



mitosis by nocodazole. Mitotic cells were shaken off and boiled for the following immunoblot analysis with the antibodies against NDR1, pT210-PLK1 and tubulin.

Cropped NDR1 blot from one gel, cropped other blots from another gel.

**Supplementary Figure S4** Illustration of PLK1 chemical inhibitor experimental design and analyses

**Supplementary Figure S5** Full-length blots/gels of Figure 3b, e and f
